## p53 plays a central role in the development of osteoporosis

Tao Yu<sup>1,\*</sup>, Xiaomeng You<sup>2,\*</sup>, Haichao Zhou<sup>1</sup>, Alex Kang<sup>3</sup>, Wenbao He<sup>1</sup>, Zihua Li<sup>1</sup>, Bing Li<sup>1</sup>, Jiang Xia<sup>1</sup>, Hui Zhu<sup>1</sup>, Youguang Zhao<sup>1</sup>, Guangrong Yu<sup>1</sup>, Yuan Xiong<sup>4</sup>, Yunfeng Yang<sup>1</sup>

<sup>1</sup>Department of Orthopedic Surgery, Tongji Hospital, Tongji University School of Medicine, Shanghai 200065, China

<sup>2</sup>Department of Orthopedic Surgery, Brigham and Women's Hospital, Harvard Medical School, Boston, MA 02115, USA

<sup>3</sup>Center for Biomedical Engineering, Department of Medicine, Brigham and Women's Hospital, Harvard Medical School, Cambridge, MA 02139, USA

<sup>4</sup>Department of Orthopaedics, Union Hospital, Tongji Medical College, Huazhong University of Science and Technology, Wuhan 430022, China

\*Equal contribution

**Correspondence to:** Yunfeng Yang, Yuan Xiong; email: [yangyunfeng1051@126.com](mailto:yangyunfeng1051@126.com), [xiongyuanmed@163.com](mailto:xiongyuanmed@163.com)

**Keywords:** osteoporosis, osteogenesis, bone mass density, p53

**Received:** February 17, 2020

**Accepted:** April 20, 2020

**Published:** June 2, 2020

**Copyright:** Yu et al. This is an open-access article distributed under the terms of the Creative Commons Attribution License (CC BY 3.0), which permits unrestricted use, distribution, and reproduction in any medium, provided the original author and source are credited.

### ABSTRACT

Osteoporosis is a metabolic disease affecting 40% of postmenopausal women. It is characterized by decreased bone mass per unit volume and increased risk of fracture. We investigated the molecular mechanism underlying osteoporosis by identifying the genes involved in its development. Osteoporosis-related genes were identified by analyzing RNA microarray data in the GEO database to detect genes differentially expressed in osteoporotic and healthy individuals. Enrichment and protein interaction analyses carried out to identify the hub genes among the differentially expressed genes revealed *TP53*, *MAPK1*, *CASP3*, *CTNNB1*, *CCND1*, *NOTCH1*, *CDK1*, *IGF1*, *ERBB2*, *CYCS* to be the top 10 hub genes. In addition, p53 had the highest degree score in the protein-protein interaction network. In vivo and in vitro experiments showed that *TP53* gene expression and serum p53 levels were upregulated in osteoporotic patients and a mouse osteoporosis model. The elevated p53 levels were associated with decreases in bone mass, which could be partially reversed by knocking down p53. These findings suggest p53 may play a central role in the development of osteoporosis.

### INTRODUCTION

Osteoporosis is a metabolic disease characterized by decreased bone mass per unit volume, despite the bone tissue having normal calcification and a normal ratio of calcium salt and matrix [1]. Osteoporosis can occur in both genders at any age, but it is most common in postmenopausal women. Overall, the disease affects 30% of women and 12% of men at some point in their lifetimes [2], but it affects more than 40% of postmenopausal women [3]. Patients with osteoporosis usually have bone pain and are prone to having a fracture [1]. As one of the most commonly occurring chronic diseases among the

elderly, osteoporosis has become a serious problem for public health care systems [4]. The main therapeutic strategies for treating osteoporosis are the use anti-resorptive and anabolic drugs. However, most of the drugs in these classes have limitations and adverse side effects [3].

The pathogenesis of osteoporosis has not yet been fully elucidated. Factors that inhibit osteogenesis, promote bone resorption, or cause bone microstructural destruction may play a role in the development of osteoporosis, and a variety of genes may be directly or indirectly involved. For example, mutations of *COL1* are responsible for osteogenesis imperfecta [5], while

allelic variation of *TCIRG1* are significantly associated with low bone mineral density (BMD) in a certain population [6]. In addition, Xie et al. also suggested that *CTNNB1* and *TP53* may play crucial roles in primary osteoporosis [7]. Osteoporosis is thus potentially associated with multiple genes and may result from gene-environment interactions [2].

Bioinformatics technology has been used to integrate and analyze big data from public database repositories for several diseases. For instance, bioinformatic methods have demonstrated prevalent alterations in RNA methylation regulators across cancer types. It was concluded that the m<sup>6</sup>A regulators tightly correlate with the activation and inhibition of cancer pathways, and also correlate with prognostically relevant tumor subtypes [8].

In the present study, we applied similar bioinformatic analysis of an osteoporosis microarray dataset retrieved from the Gene Expression Omnibus (GEO) to explore the mechanism underlying osteoporosis. Identification and validation of differentially expressed genes (DEGs) suggest that p53 may play a key role in the development of osteoporosis.

## RESULTS

### Identification of DEGs

The GSE100609 dataset was obtained from the GEO database. It included gene expression profiles from 4 healthy individuals and 4 osteoporotic patients. Analysis of the dataset using the Morpheus online tool revealed 509 (228 upregulated and 281 downregulated) genes that were differentially expressed between the healthy group and the osteoporotic patients. The top 30 upregulated and downregulated genes are shown in Figure 1.

### Gene Ontology (GO) and Kyoto Encyclopedia of Genes and Genomes (KEGG) pathway enrichment analyses

GO term analysis and KEGG pathway enrichment analyses were performed using the Database for Annotation, Visualization and Integrated Discovery (DAVID) bioinformatics tool. The results showed that under the biological processes category, upregulated DEGs in osteoporotic patients were significantly enriched in “Regulation of locomotion,” “Regulation of cellular component movement,” “Regulation of cell motility,” “Anatomical structure formation involved in morphogenesis,” and “Movement of cell or subcellular component.” On the other hand, the DEGs downregulated in osteoporotic patients were

enriched in “Axon extension,” “Regulation of cellular component movement,” “Neuron projection extension,” “Developmental growth involved in morphogenesis,” and “Positive regulation of cellular protein metabolic process” (Table 1). The top five KEGG pathways for the DEGs upregulated in osteoporotic patients were “cancer pathway,” “small cell lung cancer pathway,” “p53 signaling pathway,” “Wnt signaling pathway,” and “rap1 signaling pathway.” The top five KEGG pathways for the DEGs downregulated in osteoporotic patients were “axon guidance pathway,” “bacterial invasion of epithelial cells pathway,” “African trypanosomiasis pathway,” “Alzheimer's disease pathway,” and “calcium signaling pathway” (Table 2 and Figure 2).

### Protein-protein interaction (PPI) network construction and module analysis

A PPI network was constructed using STRING (Figure 3), and the top 10 hub genes with the highest degrees of interaction were determined with Cytoscape. These hub genes were *TP53*, *MAPK1*, *CASP3*, *CTNNB1*, *CCND1*, *NOTCH1*, *CDK1*, *IGF1*, *ERBB2*, and *CYCS* (Table 3). Gene centrality is represented by indexes of degree, closeness, and betweenness. Degree represented the degree of association of one node with all other nodes in the network. Closeness represented the closeness between a node and other nodes in the network. Betweenness was the number of times a node acted as the shortest bridge between two other nodes. The results for degree, closeness and betweenness are showed in Figure 4. Among the 10 hub genes, TP53 had the highest degree score of 174, indicating it potentially plays an important role during the development of osteoporosis.

The genes involved in the six PPI network modules with MCODE scores  $\geq 5$  and  $> 5$  nodes (Table 4) were characterized through GO term and KEGG pathway enrichment analyses. In the biological process category, the GO terms “Cellular response to chemical stimulus,” “Positive regulation of cellular metabolic process,” and “Positive regulation of macromolecule metabolic process” were significantly enriched. In addition, in the molecular function category, “Enzyme binding,” “Receptor binding,” and “Macromolecular complex binding” were also significantly enriched. Among KEGG pathways, “signaling pathway of cancer pathway,” “proteoglycans in cancer pathway,” and “p53 signaling pathway” were enriched (Table 5). In Figure 5, the top 10 genes associated with the enriched GO term/KEGG pathway are illustrated using a chord diagram. Expression of the top 50 genes from the 6 modules and their positions on chromosomes are also shown in Figure 6.

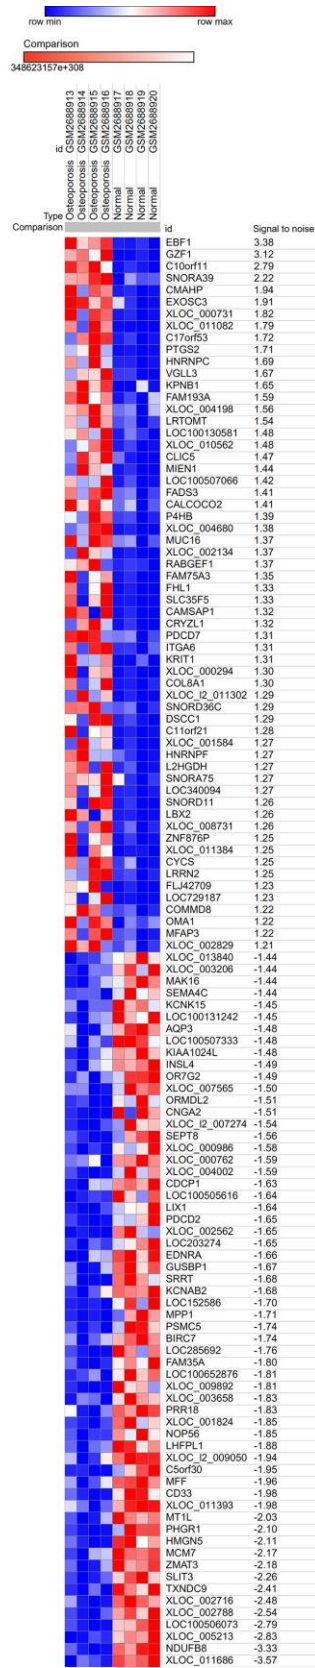

**Figure 1. Heat map of the top 60 DEGs in GSE100609 (30 upregulated and 30 downregulated).** The GSE100609 dataset, which included gene expression profiles from four healthy individuals and four osteoporotic patients, was obtained from the GEO database. In total, 228 upregulated and 281 downregulated DEGs were identified. Red, upregulation; blue, downregulation.

**Table 1. GO analysis of DEGs involved in biological processes.**

| <b>Upregulated</b>   |                                                           |              |                |
|----------------------|-----------------------------------------------------------|--------------|----------------|
| <b>Term</b>          | <b>Function</b>                                           | <b>Count</b> | <b>P-value</b> |
| GO:0040012           | Regulation of locomotion                                  | 15           | 1.5E-3         |
| GO:0051270           | Regulation of cellular component movement                 | 15           | 2.2E-3         |
| GO:2000145           | Regulation of cell motility                               | 14           | 2.9E-3         |
| GO:0048646           | Anatomical structure formation involved in morphogenesis  | 18           | 4.3E-3         |
| GO:0006928           | Movement of cell or subcellular component                 | 24           | 5.3E-3         |
| <b>Downregulated</b> |                                                           |              |                |
|                      | <b>Function</b>                                           | <b>Count</b> | <b>P-value</b> |
| GO:0048675           | Axon extension                                            | 8            | 2.7E-5         |
| GO:0048588           | Developmental cell growth                                 | 9            | 1.6E-4         |
| GO:1990138           | Neuron projection extension                               | 8            | 1.7E-4         |
| GO:0060560           | Developmental growth involved in morphogenesis            | 9            | 3.0E-4         |
| GO:0032270           | Positive regulation of cellular protein metabolic process | 25           | 5.4E-4         |
| GO, gene ontology.   |                                                           |              |                |

**Table 2. KEGG pathway analysis of DEGs.**

| <b>Upregulated</b>   |                                                |              |                |
|----------------------|------------------------------------------------|--------------|----------------|
|                      | <b>Term*</b>                                   | <b>Count</b> | <b>P-value</b> |
| hsa05200             | Cancer pathway                                 | 10           | 1.6E-3         |
| hsa05222             | Small cell lung cancer pathway                 | 5            | 3.0E-3         |
| hsa04115             | p53 signaling pathway                          | 4            | 1.2E-2         |
| hsa04310             | Wnt signaling pathway                          | 5            | 1.6E-2         |
| hsa04015             | Rap1 signaling pathway                         | 5            | 6.1E-2         |
| <b>Downregulated</b> |                                                |              |                |
|                      | <b>Term*</b>                                   | <b>Count</b> |                |
| hsa04360             | Axon guidance pathway                          | 8            | 4.1E-3         |
| hsa05100             | Bacterial invasion of epithelial cells pathway | 6            | 8.0E-3         |
| hsa05143             | African trypanosomiasis pathway                | 4            | 1.5E-2         |
| hsa05010             | Alzheimer's disease pathway                    | 7            | 5.2E-2         |
| hsa04020             | Calcium signaling pathway                      | 7            | 6.7E-2         |

\*The top 5 terms were selected based on P-values when more than five terms enriched terms were identified in a category.

### Downregulating p53 expression may protect against osteoporosis in vitro and in vivo

Because *TP53* had the highest degree score among the top 10 hub genes, we hypothesized that p53 plays an important role during osteoporosis development. Consistent with our hypothesis, *TP53* gene expression was increased two-fold in the serum samples from osteoporotic patients compared to healthy controls (Figure 7B). Correspondingly, levels of p53 protein were also significantly increased in osteoporotic patients (Figure 7A), suggesting a potential role for p53 in osteoporotic development and/or progression.

In cultured human mesenchymal stem cells (hMSCs) transfected with siRNA targeting p53, expression levels

of both p53 mRNA and protein were significantly decreased as compared to cells treated with PBS (control) or a negative control siRNA (siRNA-NC) (Figure 7D, 7E). As expected, expression levels of the osteogenesis-related genes Collagen Type I Alpha 1 (*Col 1a1*), Alkaline phosphatase (*ALP*), Osteocalcin (*OCN*) and RUNX Family Transcription Factor 2 (*RunX2*) were all significantly higher in p53 knockdown cells than in control (PBS) cells or cells expressing siRNA-NC (Figure 7F, 7G).

The effect of p53 on osteoporosis was further investigated in vivo using a murine model. Osteoporosis was induced by oophorectomy the model mice treated with PBS (control), siRNA-p53 or siRNA-NC. Consistent with the in vitro experiments, bone volume



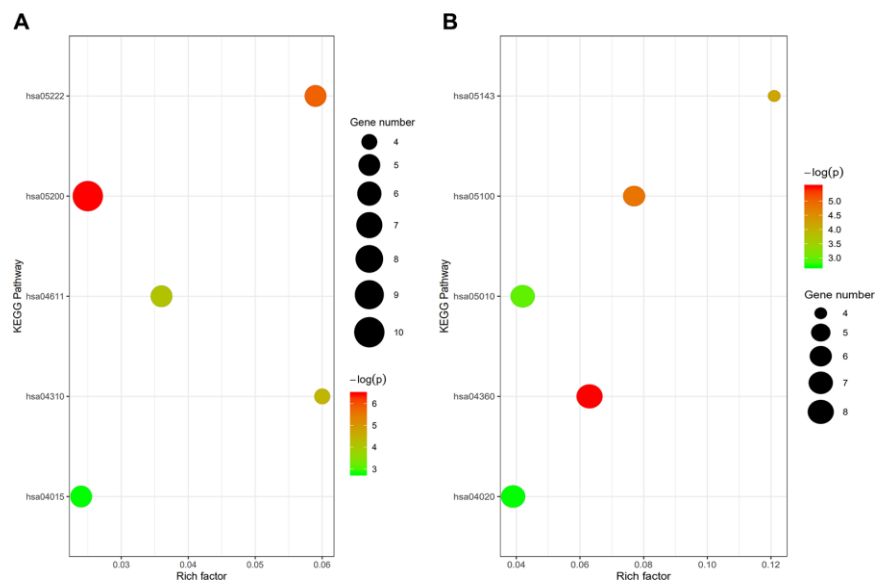

**Figure 2. (A)** Enrichment analysis of upregulated genes: hsa05200, cancer pathway; hsa05222, small cell lung cancer pathway; hsa04115, p53 signaling pathway; hsa04310, wnt signaling pathway; hsa04015, rap1 signaling pathway. **(B)** Enrichment analysis of downregulated genes: hsa04360, axon guidance pathway; hsa05100, bacterial invasion of epithelial cells pathway; hsa05143, African trypanosomiasis pathway; hsa05010, Alzheimer's disease pathway; hsa04020, calcium signaling pathway.

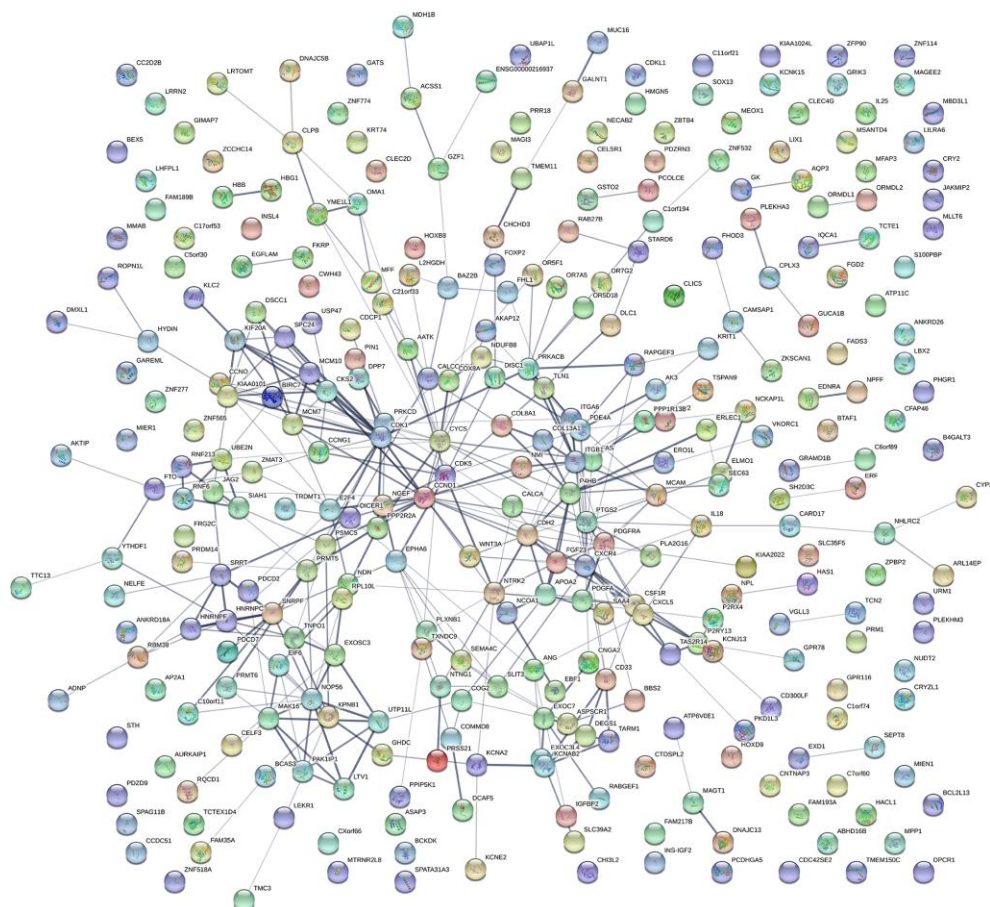

**Figure 3. Protein-protein interactions.** PPI network constructed using STRING and illustrating the interactions among DEGs.

**Table 3. Degree scores for the top 10 upregulated genes.**

| Gene ID | Gene name                          | Degree |
|---------|------------------------------------|--------|
| TP53    | Tumor protein 53                   | 174    |
| MAPK1   | Mitogen-Activated Protein Kinase 1 | 102    |
| CASP3   | Caspase 3                          | 100    |
| CTNNB1  | Catenin, beta-1                    | 89     |
| CCND1   | Cyclin D1                          | 85     |
| NOTCH1  | notch receptor 1                   | 84     |
| CDK1    | Cyclin-dependent kinase 1          | 81     |
| IGF1    | Insulin-like growth factor-1       | 76     |
| ERBB2   | erb-b2 receptor tyrosine kinase 2  | 73     |
| CYCS    | Somatic cytochrome C, somatic      | 69     |

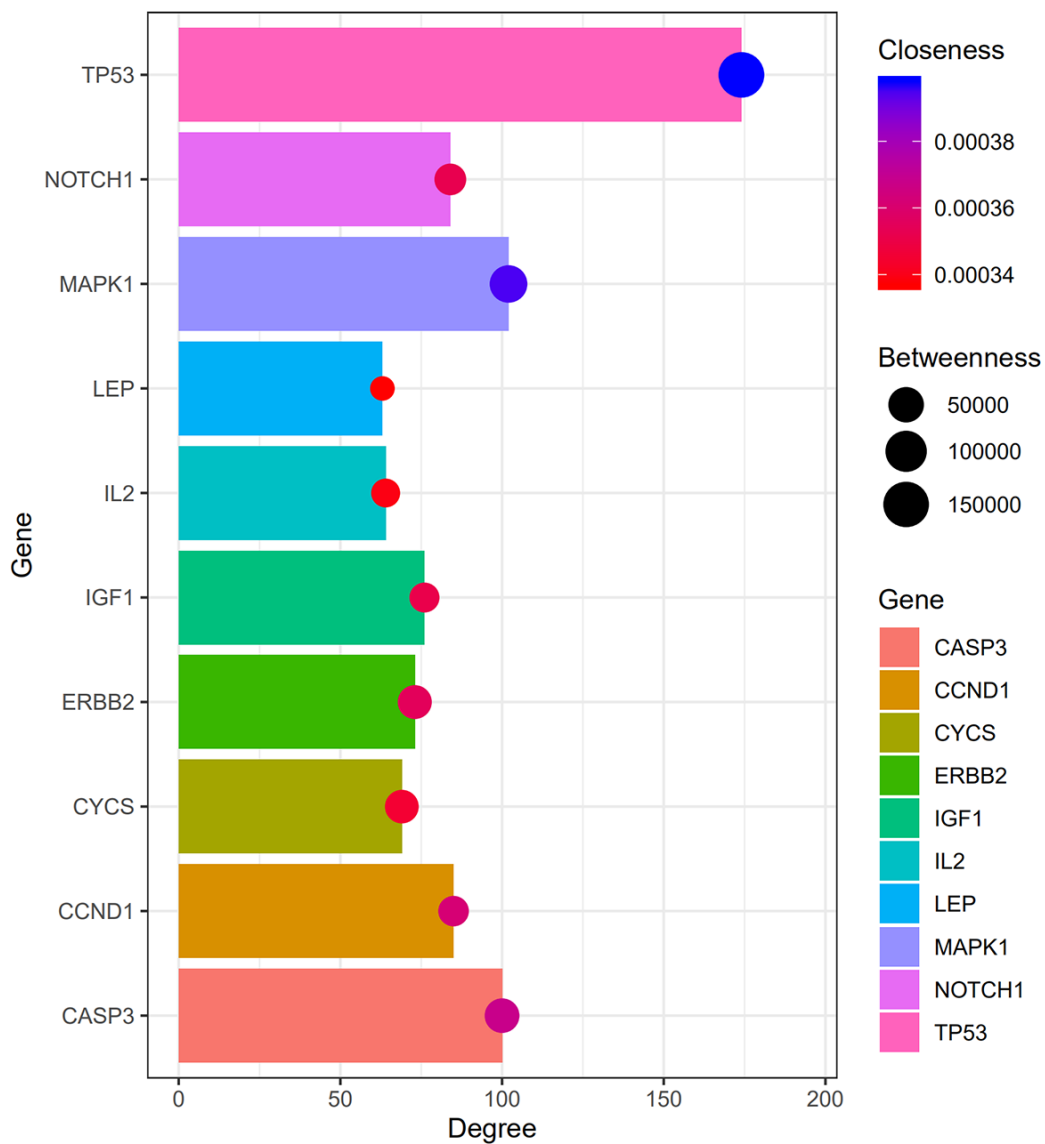

**Figure 4. Degree, betweenness, closeness of hub genes.** Within the PPI network, the top three hub genes with highest degree, betweenness and closeness scores are TP53, MAPK1, and CASP3.

**Table 4. Six modules from the PPI network with MCODE scores  $\geq 5$  and  $>5$  nodes.**

| Cluster | Score | Nodes | Edges |
|---------|-------|-------|-------|
| 1       | 17.15 | 69    | 583   |
| 2       | 10.39 | 47    | 239   |
| 3       | 7.00  | 7     | 21    |
| 4       | 5.75  | 49    | 138   |
| 5       | 5.625 | 17    | 45    |
| 6       | 5.00  | 5     | 10    |

**Table 5. Functional and pathway enrichment analysis of the genes in each module.**

| <b>A, Biological process</b>  |                                                        |       |         |
|-------------------------------|--------------------------------------------------------|-------|---------|
| Term*                         | Name                                                   | Count | P-value |
| GO:0070887                    | Cellular response to chemical stimulus                 | 80    | 1.4E-18 |
| GO:0031325                    | Positive regulation of cellular metabolic process      | 83    | 1.5E-18 |
| GO:0010604                    | Positive regulation of macromolecule metabolic process | 83    | 2.2E-18 |
| <b>B, Molecular functions</b> |                                                        |       |         |
| Term*                         | Name                                                   | Count | P-value |
| GO:0019899                    | Enzyme binding                                         | 49    | 2.2E-9  |
| GO:0005102                    | Receptor binding                                       | 43    | 4.2E-9  |
| GO:0044877                    | Macromolecular complex binding                         | 39    | 2.0E-8  |
| <b>C, KEGG pathway</b>        |                                                        |       |         |
| Term*                         | Name                                                   | Count | P-value |
| hsa05200                      | Cancer pathway                                         | 26    | 3.6E-8  |
| hsa05205                      | Proteoglycans in cancer pathway                        | 18    | 1.2E-7  |
| hsa04115                      | P53 signaling pathway                                  | 10    | 3.2E-6  |

\*The top 3 terms were selected based on P-values when more than 3 enriched terms were identified in a category.

(BV), total volume (TV), the BV/TV ratio and BMD were all significantly higher in the siRNA-p53 group than the control or siRNA-NC group (Figure 8). Thus, downregulating p53 appears to suppress features of osteoporosis both in vitro and in vivo.

## DISCUSSION

Osteoporosis is a metabolic disease characterized by low bone mass and microstructural destruction of bone tissue, resulting in increased bone fragility and proneness to fracture [1]. The pathogenesis of osteoporosis has not yet been fully elucidated. Factors that inhibit osteogenesis, promote bone resorption, and/or cause bone microstructural destruction can contribute to the development of osteoporosis.

The normal homeostasis of mature bone is maintained largely through the coordinated actions of regulating hormones and local cytokines [9]. Bone tissue continuously absorbs old bone and generates new

bone, thereby maintaining a stable state of bone turnover [10]. With increasing age, however, the rate of bone turnover gradually declines, leading to gradual declines in BMD and bone mineral content (BMC) [11]. In general, the annual rate of BMD loss is about 0.5%, but the rate of BMD loss is usually slower in older men than women, in part because women experience a rapid loss of estrogen [12]. No such rapid hormonal change occurs in men [12]. The BMD loss is accompanied by distortion and destruction of bone microstructure. Some structures such as the trabeculae are unable to maintain normal morphology, resulting in narrowing, thinning, bending, and/or misalignment of trabecular bone, and even micro-injury or micro-fractures [13]. In some of the worse cases, the bone is completely absorbed and cavities develop. In those areas, the cortical bone becomes thinner, numbers of trabeculae decrease, and fragility increases until spontaneous compression fractures (e.g. in vertebral bodies) or transverse fractures (e.g. in the femoral neck or distal radius) occur [14].



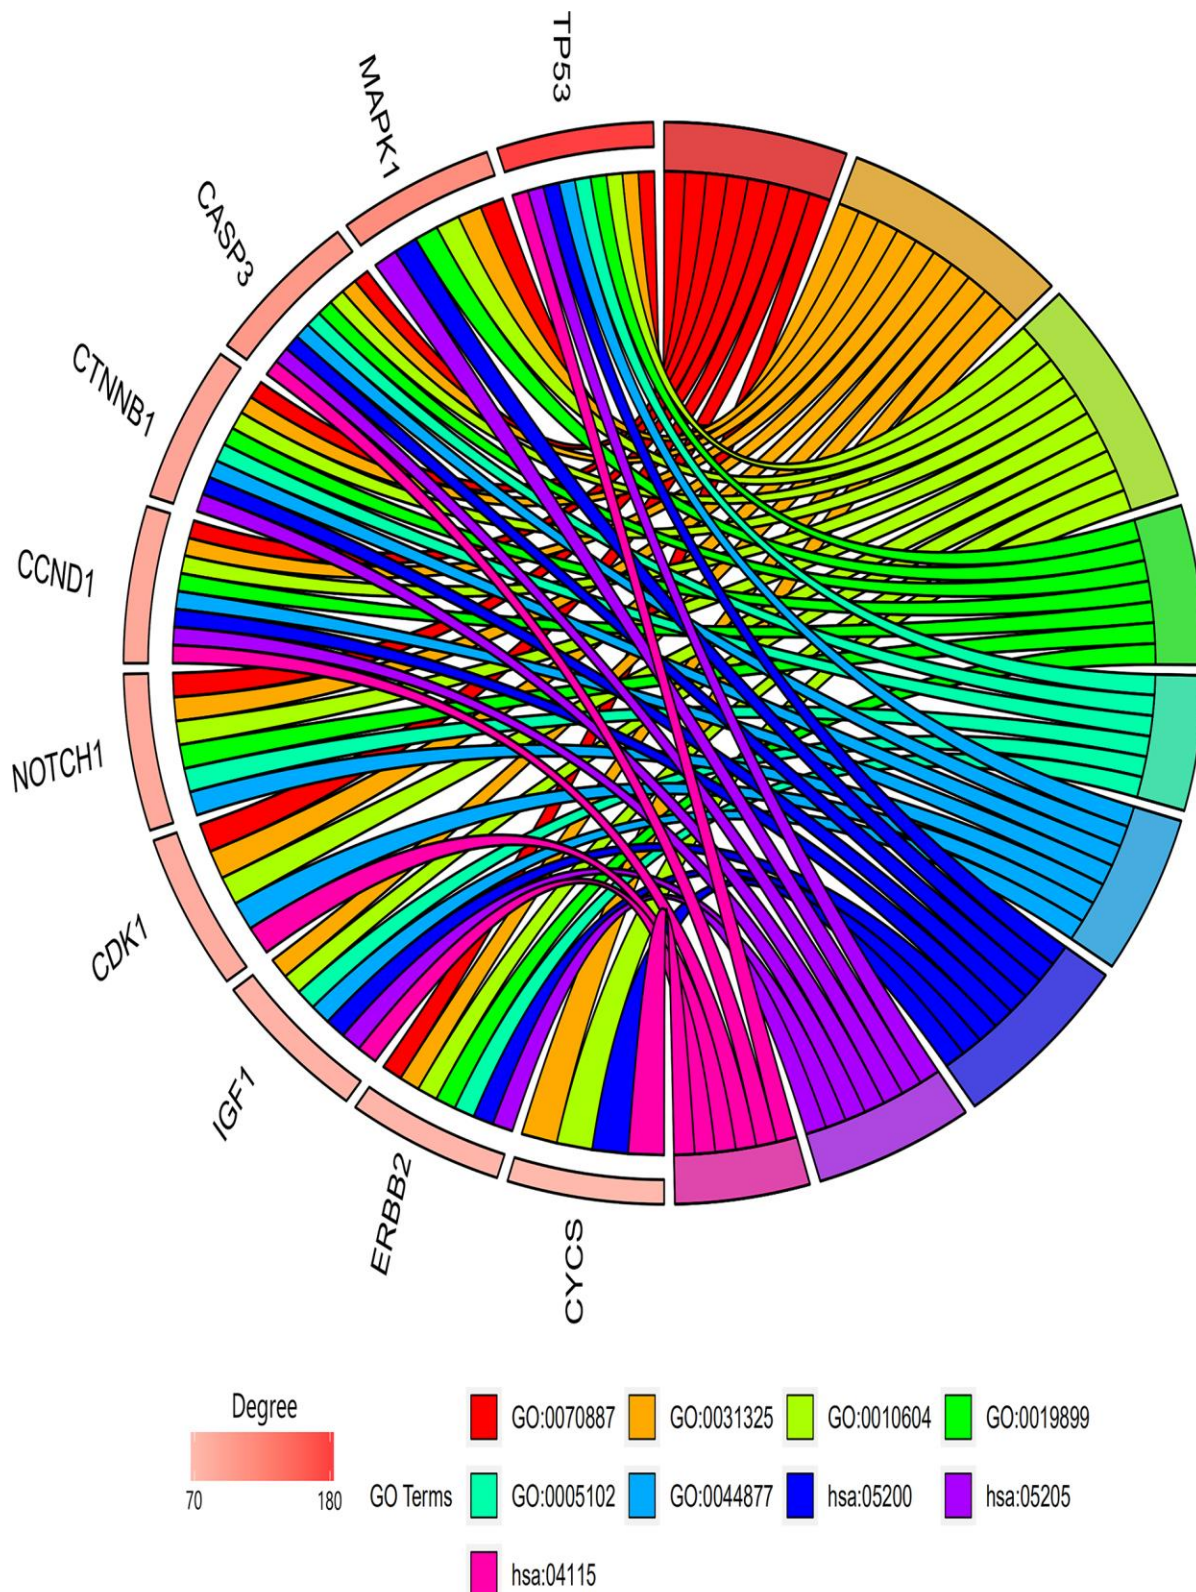

**Figure 5. GO terms/KEGG pathways associated with top 10 enriched hub genes.** Biological process module: GO:0070887, cellular response to chemical stimulus; GO:0031325, positive regulation of cellular metabolic process; GO:0010604, positive regulation of macromolecule metabolic process. Molecular functions module: GO:0019899, enzyme binding; GO:0005102, receptor binding; GO:0044877, macromolecular complex binding. KEGG pathway module: hsa05200, cancer pathway; hsa05205, proteoglycans in cancer pathway; hsa04115, p53 signaling pathway.



Osteoporosis is a multifactorial disease [15] and a variety of genes and signaling pathways participate its pathogenesis [16]. In the present study, we analyzed the interactions among involved proteins and ranking the top 10 hub genes. The identified hub genes were *TP53*, *MAPK1*, *CASP3*, *CTNNB1*, *CCND1*, *NOTCH1*, *CDK1*, *IGF1*, *ERBB2*, and *CYCS*. Moreover, we found that nearly all of the top 10 hub genes were involved in the top five enriched GO terms or KEGG pathways, indicating their potential roles in osteoporosis progression. Consistent with our findings, a number of studies have previously reported the involvement of *TP53*, *MAPK1*, *CASP3*, *CTNNB1*, *CCND1*, *NOTCH1*, *CDK1*, *IGF1*, *ERBB2* in osteoporosis or osteogenesis [7, 17–24]. For example, Liu et al. reported that p53

inhibits osteogenesis by affecting the function of MSCs via miRNA signaling pathways [20]. Xie et al. found that *CTNNB1* and *TP53* are the most upregulated DEGs and may play a crucial role in primary osteoporosis [7]. It was also reported by that signaling in the MAP kinase pathway is differentially activated in MSCs derived from osteoporotic postmenopausal women [17], and that miR-378 overexpression attenuates high glucose-mediated suppression of osteogenic differentiation by targeting *CASP3* and activating the PI3K/Akt pathway [23]. In addition, Notch appears to suppresses osteoblast differentiation, at least in part by restricting glucose metabolism [18], and inhibiting microRNA-139-5p promotes osteogenic differentiation of BMSCs by activating the Wnt/beta-catenin signaling pathway by

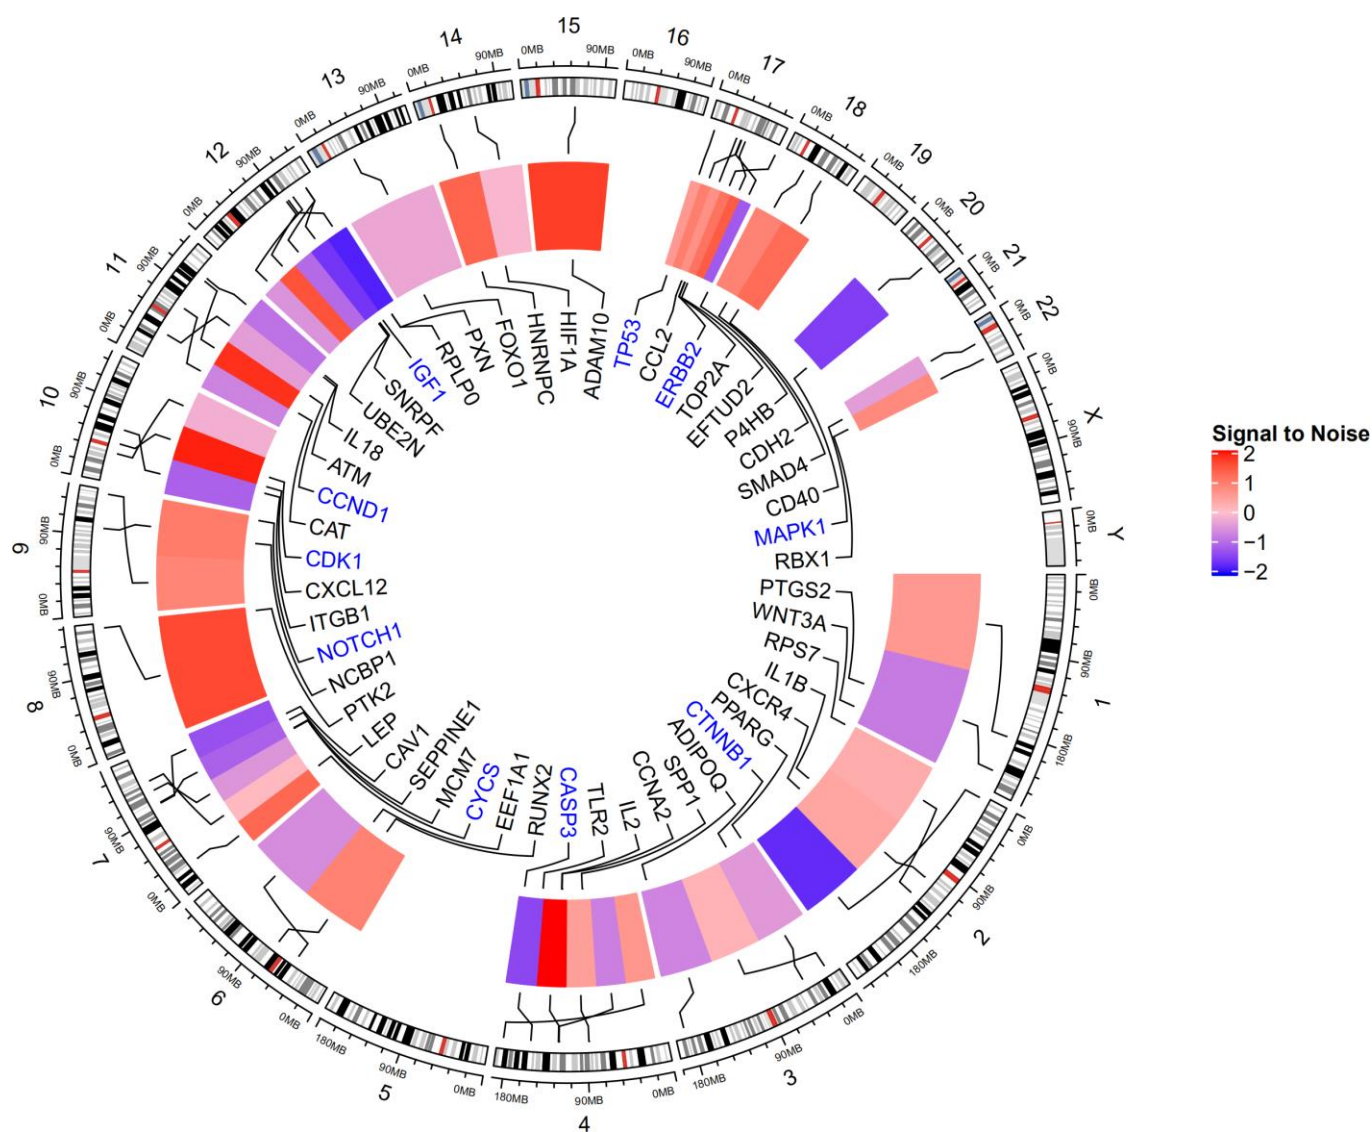

**Figure 6. Expression of top 50 genes based on degree score from the 6 modules and their positions on chromosome.** The hub genes *TP53*, *MAPK1*, *CASP3*, *CTNNB1*, *CCND1*, *NOTCH1*, *CDK1*, *IGF1*, *ERBB2*, and *CYCS* are highlighted in blue. *TP53*, *MAPK1*, and *CASP3* are located on chromosomes 17, 22, and 4, respectively.

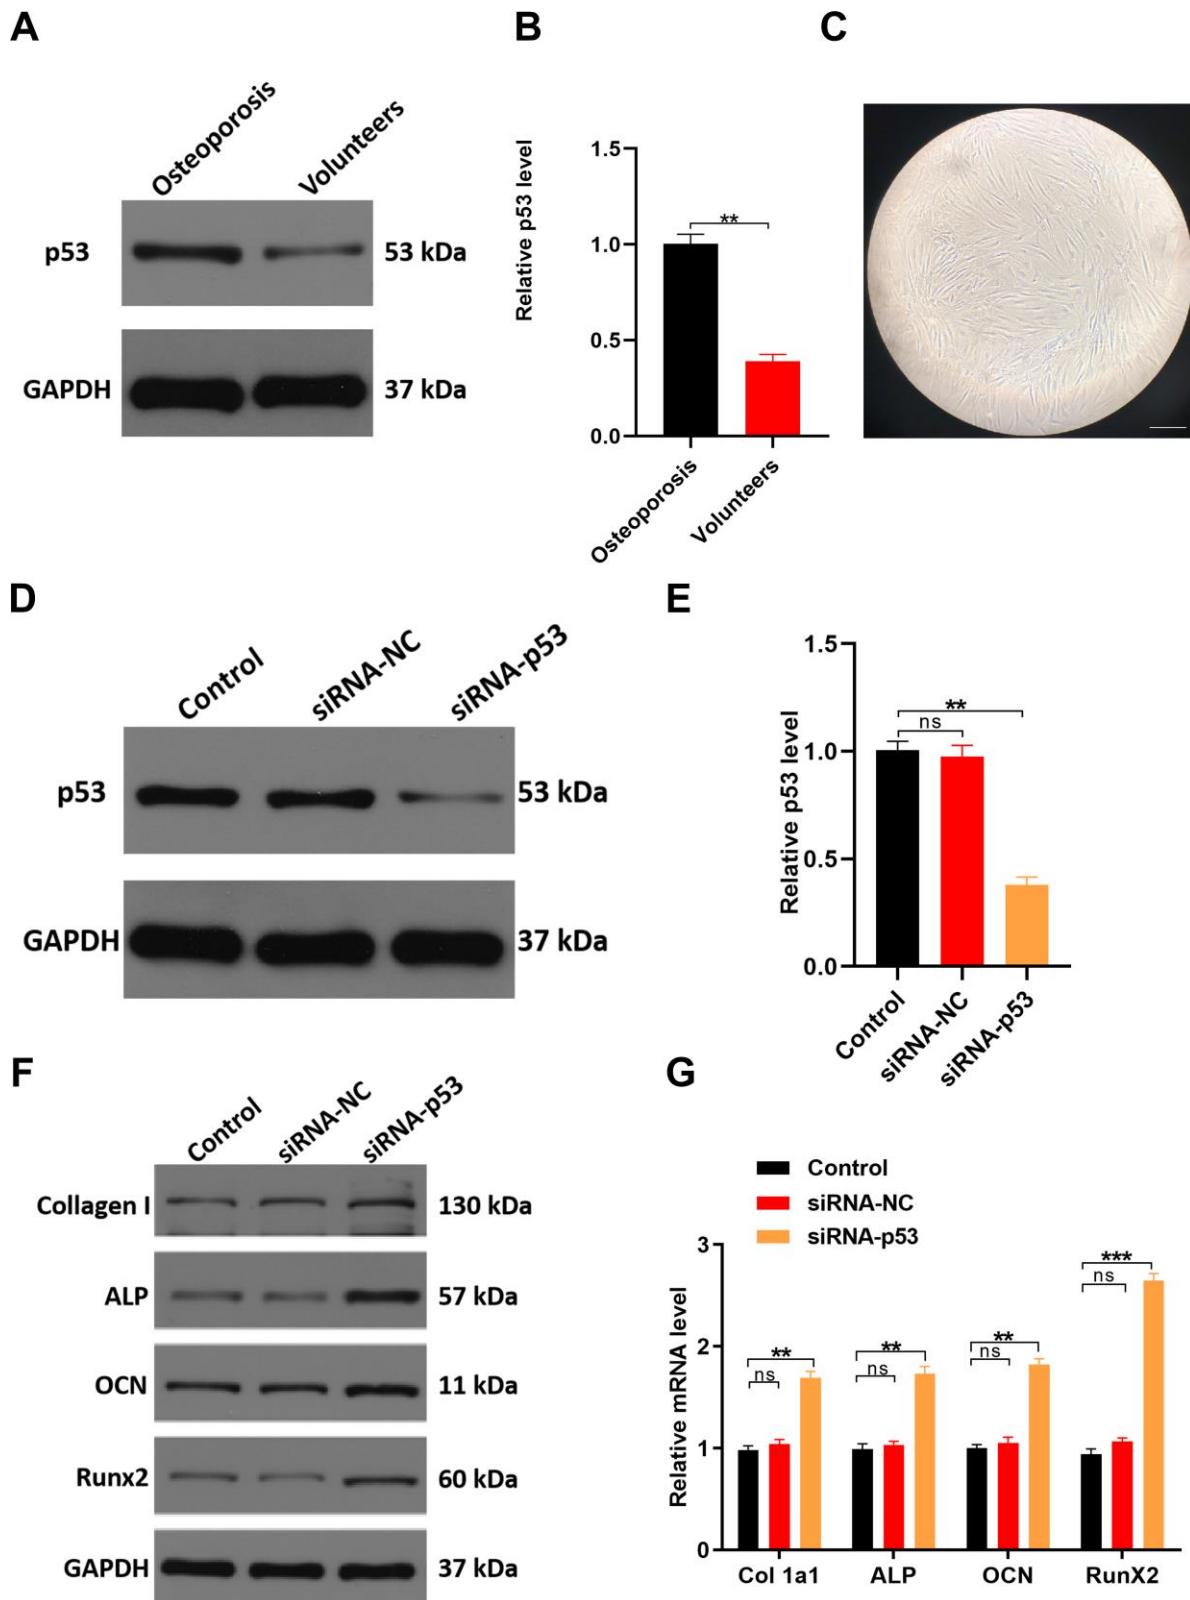

**Figure 7. Downregulating p53 expression may protect against osteoporosis in vitro.** (A, B) qRT-PCR and western blot analyses comparing p53 expression between healthy volunteers and osteoporosis patients. (C) Cellular morphology of hMSCs, scale bar, 50  $\mu$ m. (D, E) hMSCs were treated with PBS, siRNA-NC, or siRNA-p53, after which p53 expression was assessed with qRT-PCR and western blotting. (F, G) qRT-PCR and western blot analysis of osteogenesis-related mRNAs in the three groups. Data are means $\pm$ SD of triplicate experiments. \* $p < 0.05$ , \*\* $p < 0.01$ , \*\*\* $p < 0.001$ .

targeting NOTCH1 [21]. CDK1, which is essential for osteoblast proliferation, functions as a molecular switch that shifts osteoblast proliferation to maturation [22]. IGF-1 is a key regulator of longitudinal skeletal growth and is an anabolic hormone that influences bone modeling and remodeling throughout life [19]. Finally, sustained activation of ErbB1 and ErbB2 enhances hMSC osteogenesis [24]. All these findings are consistent with the bioinformatics analysis reported in the present study.

P53 had the highest degree score in the PPI network, indicating it may play a central role during the development of osteoporosis. P53 is encoded by the tumor suppressor gene *TP53* and suppresses tumor growth by slowing cell growth and division. In the present study, it is found that serum p53 levels are increased in osteoporosis patients, and knocking down p53 partially reversed decreases in BMD in vitro and in vivo. In addition, GO and KEGG enrichment analyses indicate that p53 is involved in “the cancer pathway,”

“proteoglycans in cancer pathway,” and “P53 signaling pathway.” We therefore suggest that p53 may contribute to the pathogenesis of osteoporosis via these pathways.

There are a few limitations to this study. First, only one dataset was found for the bioinformatics analysis. Analysis of additional datasets would strengthen the evidence from bioinformatics analyses. Second, we did not perform a subgroup analysis of different osteoporosis subtypes, which may involve different signaling pathways and genes. A future study will focus on investigating how p53 interacts with other osteoporosis-related pathogenic genes in different osteoporosis subtypes.

In summary, our findings suggest that p53 may play a key role in the development of osteoporosis, and that suppressing some of the activities of p53 may inhibit the development and/or progression of osteoporosis. For that reason, we suggest p53 should be considered a potential therapeutic target for the treatment of osteoporosis.

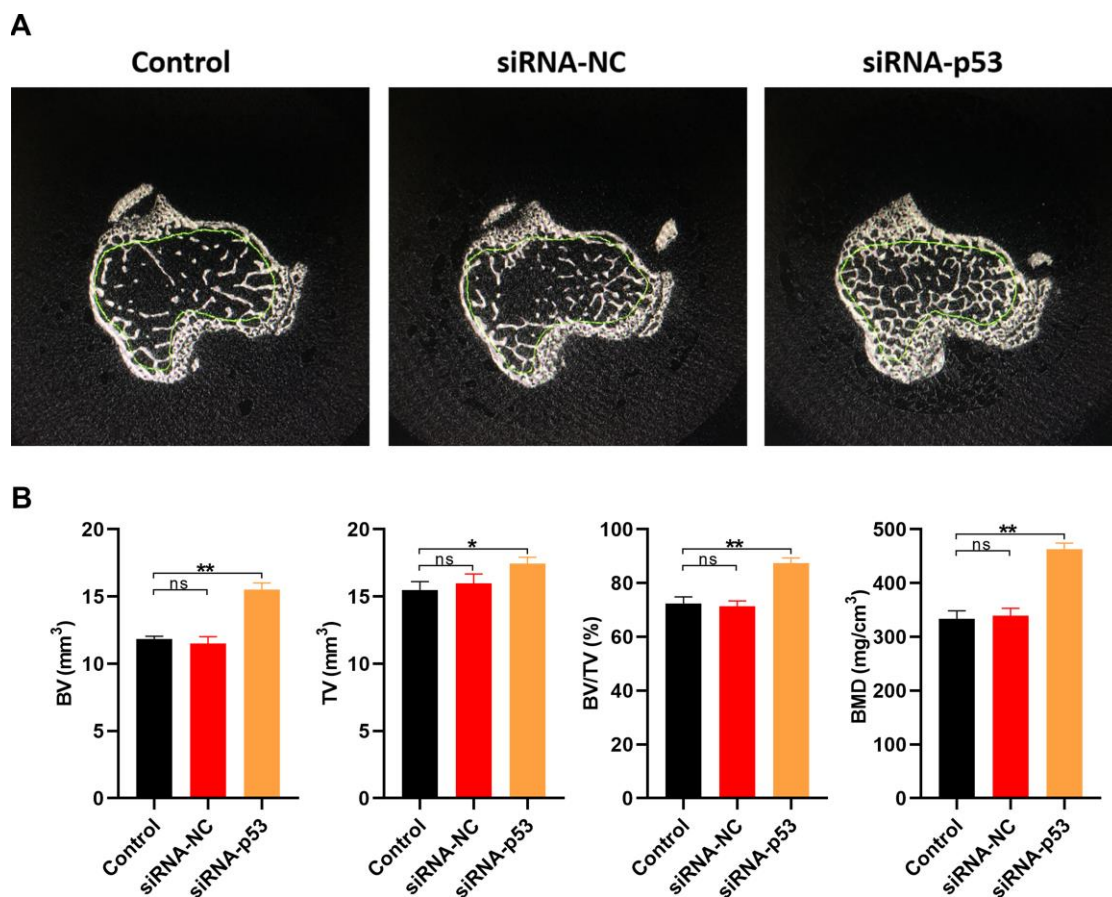

**Figure 8. Downregulating p53 expression may protect against osteoporosis in vivo.** (A) Cross sections of bone samples from osteoporosis model mice treated for 10 weeks with PBS, siRNA-NC, or siRNA-p53 (n=10 in each group). (B) BV, TV, BV/TV, and BMD values measured in osteoporosis model mice in each treatment group. Data are means±SD of triplicate experiments. \*p < 0.05, \*\*p < 0.01, \*\*\*p < 0.001.

## MATERIALS AND METHODS

### Search of microarray data and identification of DEGs

The microarray dataset GSE100609 for osteoporosis patients and control subjects were retrieved from the NCBI Gene Expression Omnibus (GEO). The expression data were then uploaded to and analyzed by Morpheus (Morpheus, <https://software.broadinstitute.org/morpheus>), a versatile online matrix visualization and analysis software package. The gene expression was visualized using a heatmap. Signal to noise >1 or signal to noise <1 is considered as DEGs.

### GO and KEGG pathway enrichment analysis

The DAVID version 6.8 online bioinformatics resources tool was used to perform GO term and KEGG pathway enrichment analyses [25, 26].

### PPI network analysis

The PPI network was used to further explore the functional interactions between DEGs imported into Search Tool for the Retrieval of Interacting Genes (STRING, <https://string-db.org>). Interactions with a combined score >0.5 were identified. The PPI network was then built using Cytoscape software (version 3.7.2). Modules of the PPI networks with a Molecular Complex Detection (MCODE) score  $\geq 5$  and >5 nodes were identified using the MCODE plugin in Cytoscape. Function enrichment analysis of DEGs in the top module was performed with DAVID. The DEGs were then ranked based on degree centrality using the Centiscape 2.2 plugin in Cytoscape.

### Blood collection

Between May 2016 and June 2018, peripheral blood samples were collected from patients in Shanghai Tongji Hospital (10 healthy volunteers, 10 osteoporosis patients) for gene expression analysis. The patient studies were approved by the Committees of Clinical Ethics in the Tongji Hospital (Tongji University of Medicine, Shanghai, China), and informed consent was obtained from all participants.

### Animals and specimen collection

Thirty female C57BL/6 mice (6 weeks old) were obtained from the Department of Animal Science of Tongji Hospital, Tongji University School of Medicine. A mouse osteoporosis model is established using oophorectomy. Following oophorectomy, the 30 mice were randomly divided into three groups: a control

group treated with PBS (n=10), a siRNA-NC group treated with negative control siRNA (n=10), and a siRNA-p53 group treated with p53 siRNA (n=10). We administered subcutaneously injected 5 ml of solution per kilogram body weight every 2 days for 10 weeks. The weights of the animals were recorded weekly during the experimental period. All animal experiments adhered to the National Institutes of Health Guide for the Care and Use of Laboratory Animals and were performed according to the protocols approved by the Medical Research Ethics Committee of the Tongji Hospital, Tongji University of Medicine.

### Cell culture and transfection

hMSCs were kindly donated by the Tongji Hospital, Tongji University of Medicine, Shanghai, China. Cells were maintained for a maximum of 4 passages in specific medium designed for human mesenchymal stem cells at 37°C in a 5% CO<sub>2</sub> incubator. Cells were transfection with 50 nM siRNA-NC or siRNA-p53 (GenePharma, Shanghai, China) using Lipofectamine 3000 (ThermoFisher Scientific, MA, USA, #L3000001) following the manufacturers protocol.

### qRT-PCR analysis

qRT-PCR analysis was performed as described previously [27]. Briefly, Trizol reagent (ThermoFisher Scientific, MA, USA, #L15596026) was applied to extract total RNA. cDNA was then synthesized using a qPCR RT Master Mix kit (Toyobo, Osaka, Japan). Relative expression levels of mRNA were calculated using the 2- $\Delta\Delta$ Ct method (Ct of GAPDH minus the Ct of the target genes) and normalized to the level of U6 mRNA determined as the 2- $\Delta\Delta$ Ct. The primer sequences used were as follows: for p53, CAGCACATGACGG AGGTTGT (forward) and TCATCCAAATACTCCA CACGC (reverse); for Col 1a1, TGGCAAAGATGGAC TCAACG (forward) and TCACGGTCACGAACCA CATT (reverse); for ALP, GCTCTGGAAAGTCCTT CAAAGC (forward) and TCTTCTTCCCTGGACACT GCC (reverse); for OCN, TCACACTCCTCGCCCTA TTG (forward) and CTCCTGAAAGCCGATGTGGT (reverse); for Runx2, CTACTATGGCACTTCGTCAGG AT (forward) and ATCAGCGTCAACACCATCATT (reverse); and for GAPDH, GGAAGCTTGTCAATCA TGGAAATC (forward) and TGATGACCCTTTTGG CTCCC (reverse).

### Western blotting analysis

Cell lysates were prepared using NETN buffer (20 mM Tris HCl [pH 8.0], 100 mM NaCl, 1 mM EDTA and 0.5% Nonidet P-40) and were resolved by SDS-PAGE.



Proteins were transferred to PVDF membranes, which were blocked in 5% skim milk overnight at 4°C. The membranes were probed with primary antibodies and labeled with HRP-conjugated secondary antibodies (Aspen, Johannesburg, South Africa, #AS1058). Chemiluminescence detection systems (Canon, Tokyo, Japan, #LiDE110) were used to visualize the protein bands. The antibodies used were as follows: anti-collagen I (1:500, Abcam, MA, USA, #ab34710), anti-ALP (1:1,000, Abcam, MA, USA, #ab95462), anti-Osteocalcin (1:500, Abcam, MA, USA, #ab93876), anti-RunX2 (1:500, Abcam, MA, USA, #ab23981), anti-p53 (1:5,00, #ab131442, Abcam, MA, USA), and anti-GAPDH (1:10,000, Abcam, MA, USA, #ab37168).

### Micro-CT analysis

All samples were scanned using a BRUKER SkyScan 1276 scanner microCT system (BRUKER, Karlsruhe, Germany) to provide images at 2400 views, 5 frames/view, 37 kV, and 121mA. The bone trabeculae selected were approximately 0.2 mm below the proximal humerus growth plate and measured 0.5 mm in length. After scanning, calluses were preserved at -80°C for miRNA extraction, qRT-PCR, and western blot analysis. Measurement parameters were as follows: bone volume (BV), total volume (TV), BV/TV, and BMD.

### Statistical analysis

GraphPad Prism 8.0 (GraphPad Software, Inc.) was used for statistical analyses. The data are presented as the mean  $\pm$  standard deviation (SD). Comparisons between two groups were made using Student's t-test. Comparisons among three groups were made using one-way ANOVA with post-hoc Tukey's test.

### AUTHOR CONTRIBUTIONS

YY and YX conceived and designed the study; GY, HZ and BL supervised the study; TY and XY performed bioinformatics analysis and experiments; HCZ, WH and ZL analyzed the data; JX and YZ provided advice and technical assistance; TY, XY and AK prepared the manuscript. All authors approved the final manuscript.

### CONFLICTS OF INTEREST

The authors declare there is no conflicts of interest.

### FUNDING

This study was supported by the National Science Foundation of China (No.31600754, NO.81472144).

### REFERENCES

1. Golob AL, Laya MB. Osteoporosis: screening, prevention, and management. *Med Clin North Am.* 2015; 99:587–606. <https://doi.org/10.1016/j.mcna.2015.01.010> PMID:[25841602](https://pubmed.ncbi.nlm.nih.gov/25841602/)
2. Armas LA, Recker RR. Pathophysiology of osteoporosis: new mechanistic insights. *Endocrinol Metab Clin North Am.* 2012; 41:475–86. <https://doi.org/10.1016/j.ecl.2012.04.006> PMID:[22877425](https://pubmed.ncbi.nlm.nih.gov/22877425/)
3. Rachner TD, Khosla S, Hofbauer LC. Osteoporosis: now and the future. *Lancet.* 2011; 377:1276–87. [https://doi.org/10.1016/S0140-6736\(10\)62349-5](https://doi.org/10.1016/S0140-6736(10)62349-5) PMID:[21450337](https://pubmed.ncbi.nlm.nih.gov/21450337/)
4. Abboskhujaeva LS, Ismailov SI, Alikhanova NM. Efficacy of strontium ranelate in combination with a D-hormone analog for the treatment of postmenopausal osteoporosis. *Drugs R D.* 2014; 14:315–24. <https://doi.org/10.1007/s40268-014-0069-1> PMID:[25480348](https://pubmed.ncbi.nlm.nih.gov/25480348/)
5. Efstathiadou Z, Tsatsoulis A, Ioannidis JP. Association of collagen ialpha 1 Sp1 polymorphism with the risk of prevalent fractures: a meta-analysis. *J Bone Miner Res.* 2001; 16:1586–92. <https://doi.org/10.1359/jbmr.2001.16.9.1586> PMID:[11547828](https://pubmed.ncbi.nlm.nih.gov/11547828/)
6. Sobacchi C, Vezzoni P, Reid DM, McGuigan FE, Frattini A, Mirolo M, Albhaga OM, Musio A, Villa A, Ralston SH. Association between a polymorphism affecting an AP1 binding site in the promoter of the TCIRG1 gene and bone mass in women. *Calcif Tissue Int.* 2004; 74:35–41. <https://doi.org/10.1007/s00223-002-0004-2> PMID:[14523594](https://pubmed.ncbi.nlm.nih.gov/14523594/)
7. Xie W, Ji L, Zhao T, Gao P. Identification of transcriptional factors and key genes in primary osteoporosis by DNA microarray. *Med Sci Monit.* 2015; 21:1333–44. <https://doi.org/10.12659/MSM.894111> PMID:[25957414](https://pubmed.ncbi.nlm.nih.gov/25957414/)
8. Li Y, Xiao J, Bai J, Tian Y, Qu Y, Chen X, Wang Q, Li X, Zhang Y, Xu J. Molecular characterization and clinical relevance of M<sup>6</sup>A regulators across 33 cancer types. *Mol Cancer.* 2019; 18:137. <https://doi.org/10.1186/s12943-019-1066-3> PMID:[31521193](https://pubmed.ncbi.nlm.nih.gov/31521193/)
9. Idelevich A, Baron R. Brain to bone: what is the contribution of the brain to skeletal homeostasis? *Bone.* 2018; 115:31–42. <https://doi.org/10.1016/j.bone.2018.05.018> PMID:[29777919](https://pubmed.ncbi.nlm.nih.gov/29777919/)

10. van Schaick E, Zheng J, Perez Ruixo JJ, Gieschke R, Jacqmin P. A semi-mechanistic model of bone mineral density and bone turnover based on a circular model of bone remodeling. *J Pharmacokinet Pharmacodyn*. 2015; 42:315–32.  
<https://doi.org/10.1007/s10928-015-9423-3>  
PMID:26123920
11. Gossiel F, Altaher H, Reid DM, Roux C, Felsenberg D, Glüer CC, Eastell R. Bone turnover markers after the menopause: T-score approach. *Bone*. 2018; 111:44–48.  
<https://doi.org/10.1016/j.bone.2018.03.016>  
PMID:29551751
12. Daly RM, Rosengren BE, Alwis G, Ahlborg HG, Sernbo I, Karlsson MK. Gender specific age-related changes in bone density, muscle strength and functional performance in the elderly: a-10 year prospective population-based study. *BMC Geriatr*. 2013; 13:71.  
<https://doi.org/10.1186/1471-2318-13-71>  
PMID:23829776
13. Osterhoff G, Morgan EF, Shefelbine SJ, Karim L, McNamara LM, Augat P. Bone mechanical properties and changes with osteoporosis. *Injury*. 2016 (Suppl 2); 47:S11–20.  
[https://doi.org/10.1016/S0020-1383\(16\)47003-8](https://doi.org/10.1016/S0020-1383(16)47003-8)  
PMID:27338221
14. Cummings SR, Melton LJ. Epidemiology and outcomes of osteoporotic fractures. *Lancet*. 2002; 359:1761–67.  
[https://doi.org/10.1016/S0140-6736\(02\)08657-9](https://doi.org/10.1016/S0140-6736(02)08657-9)  
PMID:12049882
15. de Lima CA, de Lima SC, Barbosa AD, Sandrin-Garcia P, de Barros Pita W, de Azevêdo Silva J, Crovella S. Postmenopausal osteoporosis reference genes for qPCR expression assays. *Sci Rep*. 2019; 9:16533.  
<https://doi.org/10.1038/s41598-019-52612-9>  
PMID:31712560
16. Gogakos AI, Cheung MS, Bassett JD, Williams GR. Bone signaling pathways and treatment of osteoporosis. *Expert Rev Endocrinol Metab*. 2009; 4:639–50.  
<https://doi.org/10.1586/eem.09.38>  
PMID:30780784
17. Rodríguez JP, Ríos S, Fernández M, Santibañez JF. Differential activation of ERK1,2 MAP kinase signaling pathway in mesenchymal stem cell from control and osteoporotic postmenopausal women. *J Cell Biochem*. 2004; 92:745–54.  
<https://doi.org/10.1002/jcb.20119>  
PMID:15211572
18. Lee SY, Long F. Notch signaling suppresses glucose metabolism in mesenchymal progenitors to restrict osteoblast differentiation. *J Clin Invest*. 2018; 128:573–86.  
<https://doi.org/10.1172/JCI96221> PMID:30284985
19. Gao ST, Lv ZT, Zhou CK, Mao C, Sheng WB. Association between IGF-1 polymorphisms and risk of osteoporosis in chinese population: a meta-analysis. *BMC Musculoskelet Disord*. 2018; 19:141.  
<https://doi.org/10.1186/s12891-018-2066-y>  
PMID:29747606
20. Liu W, Qi M, Konermann A, Zhang L, Jin F, Jin Y. The p53/miR-17/Smurf1 pathway mediates skeletal deformities in an age-related model via inhibiting the function of mesenchymal stem cells. *Aging (Albany NY)*. 2015; 7:205–18.  
<https://doi.org/10.18632/aging.100728>  
PMID:25855145
21. Feng Y, Wan P, Yin L, Lou X. The inhibition of MicroRNA-139-5p promoted osteoporosis of bone marrow-derived mesenchymal stem cells by targeting Wnt/beta-catenin signaling pathway by NOTCH1. *J Microbiol Biotechnol*. 2020; 30:448–58.  
<https://doi.org/10.4014/jmb.1908.08036>  
PMID:31752063
22. Takahashi A, Mulati M, Saito M, Numata H, Kobayashi Y, Ochi H, Sato S, Kaldis P, Okawa A, Inose H. Loss of cyclin-dependent kinase 1 impairs bone formation, but does not affect the bone-anabolic effects of parathyroid hormone. *J Biol Chem*. 2018; 293:19387–99.  
<https://doi.org/10.1074/jbc.RA118.004834>  
PMID:30366983
23. You L, Gu W, Chen L, Pan L, Chen J, Peng Y. MiR-378 overexpression attenuates high glucose-suppressed osteogenic differentiation through targeting CASP3 and activating PI3K/akt signaling pathway. *Int J Clin Exp Pathol*. 2014; 7:7249–61.  
PMID:25400823
24. Platt MO, Roman AJ, Wells A, Lauffenburger DA, Griffith LG. Sustained epidermal growth factor receptor levels and activation by tethered ligand binding enhances osteogenic differentiation of multi-potent marrow stromal cells. *J Cell Physiol*. 2009; 221:306–17.  
<https://doi.org/10.1002/jcp.21854>  
PMID:19544388
25. Huang da W, Sherman BT, Lempicki RA. Bioinformatics enrichment tools: paths toward the comprehensive functional analysis of large gene lists. *Nucleic Acids Res*. 2009; 37:1–13.  
<https://doi.org/10.1093/nar/gkn923>  
PMID:19033363
26. Huang da W, Sherman BT, Lempicki RA. Systematic and integrative analysis of large gene lists using DAVID bioinformatics resources. *Nat Protoc*. 2009; 4:44–57.  
<https://doi.org/10.1038/nprot.2008.211>  
PMID:19131956

27. Xiong Y, Yan C, Chen L, Endo Y, Sun Y, Zhou W, Hu Y, Hu L, Chen D, Xue H, Mi B, Liu G. IL-10 induces MC3T3-E1 cells differentiation towards osteoblastic fate in murine model. *J Cell Mol Med.* 2020; 24:1076–86.  
<https://doi.org/10.1111/jcmm.14832>  
PMID:[31755174](https://pubmed.ncbi.nlm.nih.gov/31755174/)
